# Supplementary material for: More than a century of oceanic hydrography observations reveals profound climate-related changes in the Northwest Atlantic and Eastern Arctic
Source: Copernicus journal article supplement (doi:10.5194/essd-2025-611), 2025-10-17
Supplement: Supplementary file 1 [file Instrument_ID.xlsx]

## Sheet: Sheet1
Instrument_ID	Instrument_ID_code	Associated_codes
Conductivity Temperature Depth	CT	'19899','19P-7','19P45','19P53','GL','OLABS','STD12','NBmun','0CTD','0CTD1','1CTD','1CTD1','CD','CT','CTD','CU','FAPCD','FAPCU','GLCTD','GLctd','MEDCD','S0000','S0002','S0036','S0038','S0078','S0097','S0103','S0118','S0129','S0212','S0277','S0281','S0344','S0394','S0454','S0466','S0580','S0582','S0583','S0674','S0688','S0689','S0690','S0691','S0692','S0758','S0803','S0845','S0846','S0847','S0910'…
Bottle	BO	'BO','FAPBO','FAPbo','FRCBO'
Bottom Fish Trawl	BF	'BF','FAPBF'
Towed Conductivity Temperature Depth	TO	'TO','FAPTO'
Digital Bathythermograph	DT	'DT','BT'
Mechanical Bathythermograph	MB	'MB’
Expendable Bathythermograph	XB	'XB','XBT05','XBT06','XBT07','XBT10'
Profiling Float	PF	'PF','B3'
Other		'nan','21573.0'
