# Supplementary material for: More than a century of oceanic hydrography observations reveals profound climate-related changes in the Northwest Atlantic and Eastern Arctic
Source: Copernicus journal article supplement (doi:10.5194/essd-2025-611), 2025-10-17
Supplement: Supplementary file 4 [file Station_ID.xlsx]

## Sheet: Sheet1
Program	Station_ID	Latitude_Hours_N	Latitude_Minutes_N	Latitude_decimal	Longitude_Hours_W	Longitude_Minutes_W	Longitude_decimal
AZOMP	AR7W-01	53	40.8	53.68	55	33	55.55
AZOMP	AR7W-01.5	53	36.14	53.6023	55	37.53	55.6255
AZOMP	AR7W-02	53	47.8	53.7967	55	26.2	55.4367
AZOMP	AR7W-03	53	59.3	53.9883	55	15	55.25
AZOMP	AR7W-04	54	13.2	54.22	55	1.4	55.0233
AZOMP	AR7W-05	54	29.5	54.4917	54	45.4	54.7567
AZOMP	AR7W-06	54	45.7	54.7617	54	29.2	54.4867
AZOMP	AR7W-07	54	57.3	54.955	54	17.7	54.295
AZOMP	AR7W-07.5	55	2	55.0333	54	13	54.2167
AZOMP	AR7W-08	55	6.7	55.1117	54	8.3	54.1383
AZOMP	AR7W-08.5	55	11.4	55.19	54	3.6	54.06
AZOMP	AR7W-09	55	15.8	55.2633	53	59.6	53.9933
AZOMP	AR7W-09.5	55	20.5	55.3417	53	54.3	53.905
AZOMP	AR7W-10	55	25.2	55.42	53	49.6	53.8267
AZOMP	AR7W-10.5	55	30.95	55.5158	53	43.75	53.7292
AZOMP	AR7W-11	55	36.7	55.6117	53	37.9	53.6317
AZOMP	AR7W-11.25	55	40.2	55.67	53	34.35	53.5725
AZOMP	AR7W-11.5	55	43.7	55.7283	53	30.8	53.5133
AZOMP	AR7W-12	55	50.7	55.845	53	23.6	53.3933
AZOMP	AR7W-12.5	55	58.75	55.9792	53	15.35	53.2558
AZOMP	AR7W-13	56	6.8	56.1133	53	7	53.1167
AZOMP	AR7W-13.5	56	19.5	56.325	52	53.85	52.8975
AZOMP	AR7W-14	56	32.2	56.5367	52	40.7	52.6783
AZOMP	AR7W-14.5	56	44.8	56.7467	52	27.45	52.4575
AZOMP	AR7W-15	56	57.4	56.9567	52	14.2	52.2367
AZOMP	AR7W-15.5	57	10	57.1667	52	0.85	52.0142
AZOMP	AR7W-16	57	22.6	57.3767	51	47.5	51.7917
AZOMP	AR7W-16.5	57	35.3	57.5883	51	33.95	51.5658
AZOMP	AR7W-17	57	48	57.8	51	20.4	51.34
AZOMP	AR7W-17.5	58	0.5	58.0083	51	6.7	51.1117
AZOMP	AR7W-18	58	13	58.2167	50	53	50.8833
AZOMP	AR7W-18.5	58	25.7	58.4283	50	39	50.65
AZOMP	AR7W-19	58	38.4	58.64	50	25	50.4167
AZOMP	AR7W-19.5	58	51.2	58.8533	50	11	50.1833
AZOMP	AR7W-20	59	4	59.0667	49	57	49.95
AZOMP	AR7W-21	59	29	59.4833	49	28.5	49.475
AZOMP	AR7W-22	59	45	59.75	49	10	49.1667
AZOMP	AR7W-22.5	59	52	59.8667	49	2	49.0333
AZOMP	AR7W-23	59	59	59.9833	48	54	48.9
AZOMP	AR7W-23.5	60	4.75	60.0792	48	47.25	48.7875
AZOMP	AR7W-24	60	10.5	60.175	48	40.5	48.675
AZOMP	AR7W-24.5	60	14	60.2333	48	36.5	48.6083
AZOMP	AR7W-25	60	17.5	60.2917	48	32.5	48.5417
AZOMP	AR7W-25.5	60	19.75	60.3292	48	29.85	48.4975
AZOMP	AR7W-26	60	22	60.3667	48	27.2	48.4533
AZOMP	AR7W-26.5	60	24.4	60.4067	48	24.45	48.4075
AZOMP	AR7W-27	60	26.8	60.4467	48	21.7	48.3617
AZOMP	AR7W-27.5	60	30.4	60.5067	48	17.7	48.295
AZOMP	AR7W-28	60	34	60.5667	48	13.7	48.2283
AZOMP	AR7W-28.5	60	38.8	60.6467	48	8.37	48.1395
AZMP_NAFC	BI-01	57	3.5	57.06	61	18.3	61.31
AZMP_NAFC	BI-02	57	7	57.12	61	6	61.1
AZMP_NAFC	BI-03	57	15	57.25	60	41	60.68
AZMP_NAFC	BI-04	57	22.8	57.38	60	15	60.25
AZMP_NAFC	BI-05	57	31	57.52	59	49	59.82
AZMP_NAFC	BI-06	57	37	57.62	59	28.5	59.48
AZMP_NAFC	BI-07	57	38.6	57.64	59	23	59.38
AZMP_NAFC	BI-08	57	45.6	57.76	59	0	59
AZMP_NAFC	BI-09	57	53	57.89	58	35	58.58
AZMP_NAFC	MB-01	55	13	55.22	58	30.8	58.51
AZMP_NAFC	MB-02	55	15	55.25	58	26.2	58.44
AZMP_NAFC	MB-03	55	18.8	55.31	58	17.2	58.29
AZMP_NAFC	MB-04	55	22.3	55.37	58	8.7	58.15
AZMP_NAFC	MB-05	55	28.7	55.48	57	54.4	57.91
AZMP_NAFC	MB-06	55	34.6	55.58	57	40.5	57.68
AZMP_NAFC	MB-07	55	40.7	55.68	57	26.4	57.44
AZMP_NAFC	MB-08	55	44.8	55.75	57	16.7	57.28
AZMP_NAFC	MB-09	55	46.2	55.77	57	13.3	57.22
AZMP_NAFC	MB-10	55	52.3	55.87	56	59	56.98
AZMP_NAFC	MB-11	55	58.7	55.98	56	44.5	56.74
AZMP_NAFC	MB-12	56	4.7	56.08	56	30.6	56.51
AZMP_NAFC	SI-01	53	14	53.23	55	39	55.65
AZMP_NAFC	SI-02	53	20	53.33	55	30	55.5
AZMP_NAFC	SI-03	53	24.6	53.41	55	21.4	55.36
AZMP_NAFC	SI-04	53	32	53.53	55	8.7	55.15
AZMP_NAFC	SI-05	53	37	53.62	55	0	55
AZMP_NAFC	SI-06	53	45.4	53.76	54	46.6	54.78
AZMP_NAFC	SI-07	53	55	53.92	54	30	54.5
AZMP_NAFC	SI-08	54	4.9	54.08	54	13	54.22
AZMP_NAFC	SI-09	54	12	54.2	54	0	54
AZMP_NAFC	SI-10	54	21.3	54.36	53	44	53.73
AZMP_NAFC	SI-11	54	30	54.5	53	30	53.5
AZMP_NAFC	SI-12	54	38	54.63	53	15	53.25
AZMP_NAFC	SI-13	54	47	54.78	53	0	53
AZMP_NAFC	SI-14	55	4	55.07	52	30	52.5
AZMP_NAFC	WB-01	50	13.6	50.23	56	27.2	56.45
AZMP_NAFC	WB-02	50	18	50.3	56	10.9	56.18
AZMP_NAFC	WB-03	50	27	50.45	55	37	55.62
AZMP_NAFC	WB-04	50	40	50.67	55	0	55
AZMP_NAFC	WB-05	50	48	50.8	54	30	54.5
AZMP_NAFC	WB-06	50	51.1	50.85	54	19.8	54.33
AZMP_NAFC	WB-07	50	56.7	50.95	54	0	54
AZMP_NAFC	WB-08	51	5	51.08	53	30	53.5
AZMP_NAFC	WB-09	51	13.5	51.23	53	0	53
AZMP_NAFC	WB-10	51	17.9	51.3	52	43.4	52.72
AZMP_NAFC	WB-11	51	22	51.37	52	29	52.48
AZMP_NAFC	WB-12	51	30	51.5	52	0	52
AZMP_NAFC	WB-13	51	38.8	51.65	51	30	51.5
AZMP_NAFC	WB-14	51	47.3	51.79	50	59.5	50.99
AZMP_NAFC	WB-15	51	52	51.87	50	42.4	50.71
AZMP_NAFC	WB-16	51	53.7	51.9	50	36	50.6
AZMP_NAFC	WB-17	51	56	51.93	50	28	50.47
AZMP_NAFC	WB-18	51	59.6	51.99	50	15	50.25
AZMP_NAFC	WB-19	52	7	52.12	49	45	49.75
AZMP_NAFC	WB-20	52	15.5	52.26	49	15	49.25
AZMP_NAFC	FI-01	49	39.5	49.66	53	54.5	53.91
AZMP_NAFC	FI-02	49	45.3	49.76	53	35.8	53.6
AZMP_NAFC	FI-03	49	50.4	49.84	53	19.9	53.33
AZMP_NAFC	FI-04	49	55.2	49.92	53	4.9	53.08
AZMP_NAFC	FI-05	50	0.5	50.01	52	48.1	52.8
AZMP_NAFC	FI-06	50	3	50.05	52	38.9	52.65
AZMP_NAFC	FI-07	50	6.5	50.11	52	27.1	52.45
AZMP_NAFC	FI-08	50	12	50.2	52	8.5	52.14
AZMP_NAFC	FI-09	50	15	50.25	51	59.7	52
AZMP_NAFC	FI-10	50	17.7	50.3	51	48.8	51.81
AZMP_NAFC	FI-11	50	25.6	50.43	51	21.2	51.35
AZMP_NAFC	FI-12	50	31.7	50.53	51	1.4	51.02
AZMP_NAFC	FI-13	50	33.6	50.56	50	53.6	50.89
AZMP_NAFC	FI-14	50	36.2	50.6	50	46	50.77
AZMP_NAFC	FI-15	50	37.8	50.63	50	39.2	50.65
AZMP_NAFC	FI-16	50	42.3	50.71	50	22.9	50.38
AZMP_NAFC	FI-17	50	47	50.78	50	6.5	50.11
AZMP_NAFC	FI-18	50	51.3	50.86	49	49.5	49.83
AZMP_NAFC	BB-01	48	44	48.73	52	58	52.97
AZMP_NAFC	BB-02	48	48	48.8	52	45	52.75
AZMP_NAFC	BB-03	48	50	48.83	52	39	52.65
AZMP_NAFC	BB-04	48	55	48.92	52	24	52.4
AZMP_NAFC	BB-05	49	1.5	49.03	52	4	52.07
AZMP_NAFC	BB-06	49	6	49.1	51	49.8	51.83
AZMP_NAFC	BB-07	49	11.4	49.19	51	32.5	51.54
AZMP_NAFC	BB-08	49	16.8	49.28	51	16.8	51.28
AZMP_NAFC	BB-09	49	22	49.37	51	1	51.02
AZMP_NAFC	BB-10	49	31	49.52	50	32	50.53
AZMP_NAFC	BB-11	49	41	49.69	50	1	50.02
AZMP_NAFC	BB-12	49	51	49.85	49	30	49.5
AZMP_NAFC	BB-13	50	0	50	49	0	49
AZMP_NAFC	BB-14	50	10.6	50.18	48	28.3	48.47
AZMP_NAFC	BB-15	50	19.9	50.33	47	56.8	47.95
AZMP_NAFC	S27-01	47	32.8	47.55	52	35.2	52.59
AZMP_NAFC	S27-02	47	34.8	47.58	52	21	52.35
AZMP_NAFC	S27-03	47	37.8	47.63	52	7.2	52.12
AZMP_NAFC	S27-04	47	40.8	47.68	51	52.8	51.88
AZMP_NAFC	S27-05	47	44.4	47.74	51	39	51.65
AZMP_NAFC	S27-06	47	47.4	47.79	51	25.2	51.42
AZMP_NAFC	S27-07	47	50.4	47.84	51	11.4	51.19
AZMP_NAFC	S27-08	47	53.4	47.89	50	57	50.95
AZMP_NAFC	S27-09	47	56.4	47.94	50	43.2	50.72
AZMP_NAFC	S27-10	47	59.4	47.99	50	28.8	50.48
AZMP_NAFC	S27-11	48	2.4	48.04	50	15	50.25
AZMP_NAFC	S27-12	48	5.4	48.09	50	1.2	50.02
AZMP_NAFC	S27-13	48	8.4	48.14	49	46.8	49.78
AZMP_NAFC	S27-14	48	11.4	48.19	49	33	49.55
AZMP_NAFC	S27-15	48	14.4	48.24	49	18.6	49.31
AZMP_NAFC	S27-16	48	17.4	48.29	49	4.8	49.08
AZMP_NAFC	S27-17	48	21	48.35	48	51	48.85
AZMP_NAFC	S27-18	48	24	48.4	48	37.2	48.62
AZMP_NAFC	S27-19	48	26	48.43	48	24.6	48.41
AZMP_NAFC	FC-01	47	0	47	52	49.9	52.83
AZMP_NAFC	FC-02	47	0	47	52	42.3	52.71
AZMP_NAFC	FC-03	47	0	47	52	34.8	52.58
AZMP_NAFC	FC-04	47	0	47	52	19.3	52.32
AZMP_NAFC	FC-05	47	0	47	52	2	52.03
AZMP_NAFC	FC-06	47	0	47	51	29.1	51.49
AZMP_NAFC	FC-07	47	0	47	51	0	51
AZMP_NAFC	FC-08	47	0	47	50	40	50.67
AZMP_NAFC	FC-09	47	0	47	50	0	50
AZMP_NAFC	FC-10	47	0	47	49	7	49.12
AZMP_NAFC	FC-11	47	0	47	48	37	48.62
AZMP_NAFC	FC-12	47	0	47	48	7	48.12
AZMP_NAFC	FC-13	47	0	47	47	49	47.82
AZMP_NAFC	FC-14	47	0	47	47	30	47.5
AZMP_NAFC	FC-15	47	0	47	47	15	47.25
AZMP_NAFC	FC-16	47	0	47	47	10.1	47.17
AZMP_NAFC	FC-17	47	0	47	47	1	47.02
AZMP_NAFC	FC-18	47	0	47	46	50	46.83
AZMP_NAFC	FC-19	47	0	47	46	40.2	46.67
AZMP_NAFC	FC-20	47	0	47	46	29	46.48
AZMP_NAFC	FC-21	47	0	47	46	1	46.02
AZMP_NAFC	FC-22	47	0	47	45	43.8	45.73
AZMP_NAFC	FC-23	47	0	47	45	30	45.5
AZMP_NAFC	FC-24	47	0	47	45	12.8	45.21
AZMP_NAFC	FC-25	47	0	47	44	59.3	44.99
AZMP_NAFC	FC-26	47	0	47	44	46.3	44.77
AZMP_NAFC	FC-27	47	0	47	44	34.7	44.58
AZMP_NAFC	FC-28	47	0	47	44	26	44.43
AZMP_NAFC	FC-29	47	0	47	44	13.9	44.23
AZMP_NAFC	FC-30	47	0	47	44	5	44.08
AZMP_NAFC	FC-31	47	0	47	43	50	43.83
AZMP_NAFC	FC-32	47	0	47	43	45	43.75
AZMP_NAFC	FC-33	47	0	47	43	24	43.4
AZMP_NAFC	FC-34	47	0	47	43	15	43.25
AZMP_NAFC	FC-35	47	0	47	43	0	43
AZMP_NAFC	FC-36	47	0	47	42	45	42.75
AZMP_NAFC	FC-37	47	0	47	42	30	42.5
AZMP_NAFC	FC-38	47	0	47	42	0	42
AZMP_NAFC	SEGB-01	46	35	46.58	52	56	52.93
AZMP_NAFC	SEGB-02	46	30	46.5	52	51	52.85
AZMP_NAFC	SEGB-03	46	21	46.35	52	44	52.73
AZMP_NAFC	SEGB-04	46	12.5	46.21	52	36.5	52.61
AZMP_NAFC	SEGB-05	46	4.2	46.07	52	30	52.5
AZMP_NAFC	SEGB-06	45	47.3	45.79	52	16	52.27
AZMP_NAFC	SEGB-07	45	27.5	45.46	52	0	52
AZMP_NAFC	SEGB-08	45	5.7	45.1	51	42	51.7
AZMP_NAFC	SEGB-09	44	43.5	44.73	51	23.7	51.4
AZMP_NAFC	SEGB-10	44	21.8	44.36	51	6.2	51.1
AZMP_NAFC	SEGB-11	44	0	44	50	48.5	50.81
AZMP_NAFC	SEGB-12	43	38	43.63	50	31	50.52
AZMP_NAFC	SEGB-13	43	12	43.2	50	10	50.17
AZMP_NAFC	SEGB-14	42	55.2	42.92	49	56.5	49.94
AZMP_NAFC	SEGB-15	42	51	42.85	49	53.2	49.89
AZMP_NAFC	SEGB-16	42	46.5	42.78	49	49.7	49.83
AZMP_NAFC	SEGB-17	42	35.3	42.59	49	41	49.68
AZMP_NAFC	SEGB-18	42	23.7	42.4	49	31.1	49.52
AZMP_NAFC	SEGB-19	42	4.9	42.08	49	16.2	49.27
AZMP_NAFC	SEGB-20	41	42	41.7	48	57	48.95
AZMP_NAFC	SEGB-21	41	20	41.33	48	40	48.67
AZMP_NAFC	SS-01	48	15.29	48.25	53	25.69	53.43
AZMP_NAFC	SS-02	48	14.8	48.25	53	28.23	53.47
AZMP_NAFC	SS-03	48	13.55	48.23	53	31.15	53.52
AZMP_NAFC	SS-04	48	13.05	48.22	53	32.75	53.55
AZMP_NAFC	SS-05	48	12	48.2	53	34.59	53.58
AZMP_NAFC	SS-06	48	11.45	48.19	53	35.7	53.6
AZMP_NAFC	SS-07	48	10.51	48.18	53	37.73	53.63
AZMP_NAFC	SS-08	48	9.83	48.16	53	40.1	53.67
AZMP_NAFC	SS-09	48	9.43	48.16	53	42.05	53.7
AZMP_NAFC	SS-10	48	9.5	48.16	53	43.3	53.72
AZMP_NAFC	SS-12	48	9.56	48.16	53	44.76	53.75
AZMP_NAFC	SS-13	48	9.66	48.16	53	44.56	53.74
AZMP_NAFC	SS-14	48	9.8	48.16	53	44.34	53.74
AZMP_NAFC	SS-11	48	9.93	48.17	53	44.09	53.73
AZMP_NAFC	SS-15	48	10.15	48.17	53	43.79	53.73
AZMP_NAFC	SS-16	48	10.26	48.17	53	43.65	53.73
AZMP_NAFC	SS-17	48	10.46	48.17	53	44.46	53.74
AZMP_NAFC	SS-18	48	10.97	48.18	53	45.27	53.75
AZMP_NAFC	SS-19	48	11.21	48.19	53	47.3	53.79
AZMP_NAFC	SS-20	48	10.67	48.18	53	51.25	53.85
AZMP_NAFC	SS-21	48	11.59	48.19	53	52.38	53.87
AZMP_NAFC	SWSPB-01	46	46.42	46.77	55	37.14	55.62
AZMP_NAFC	SWSPB-02	46	30.29	46.5	56	1.79	56.03
AZMP_NAFC	SWSPB-03	46	10.88	46.18	56	30.65	56.51
AZMP_NAFC	SWSPB-04	45	56.55	45.94	56	52.69	56.88
AZMP_NAFC	SWSPB-05	45	50.8	45.79	57	1.4	57.11
AZMP_NAFC	SWSPB-06	45	37.01	45.62	57	22.51	57.38
AZMP_NAFC	SESPB-01	46	46.42	46.77	55	37.14	55.62
AZMP_NAFC	SESPB-02	46	26.24	46.44	55	30.84	55.51
AZMP_NAFC	SESPB-03	46	4.78	46.08	55	24.15	55.4
AZMP_NAFC	SESPB-04	45	35.25	45.59	55	15.37	55.26
AZMP_NAFC	SESPB-05	45	6.38	45.12	55	6.33	55.11
AZMP_NAFC	SESPB-06	44	59.23	44.99	55	4.07	55.07
AZMP_NAFC	SESPB-07	44	48.7	44.81	55	0.56	55.01
AZMP_NAFC	SESPB-08	44	25.83	44.43	54	53.62	54.89
AZMP_NAFC	SESPB-09	44	4.48	44.07	54	46.93	54.78
AZMP_NAFC	RB-01			59.6333			63.5667
AZMP_NAFC	RB-02			59.7167			63.0667
AZMP_NAFC	RB-03			59.7833			62.5667
AZMP_NAFC	RB-04			59.8833			62.0833
AZMP_NAFC	RB-05			59.9833			61.5667
AZMP_NAFC	RB-06			60.0833			61.05
AZMP_NAFC	HS-01			60.4383			64.125
AZMP_NAFC	HS-02			60.605			64.14
AZMP_NAFC	HS-03			60.77			64.155
AZMP_NAFC	HS-04			60.9367			64.17
AZMP_NAFC	HS-05			61.1033			64.1867
AZMP_NAFC	HS-06			61.2683			64.2017
AZMP_NAFC	HS-07			61.4367			64.2133
AZMP_NAFC	HS-08			61.6017			64.23
AZMP_NAFC	FB-01			62.2117			64.28
AZMP_NAFC	FB-02			62.1617			63.94
AZMP_NAFC	FB-03			62.1117			63.6017
AZMP_NAFC	FB-04			62.0617			63.2617
AZMP_NAFC	FB-05			62.0133			62.9233
AZMP_NAFC	FB-06			61.9617			62.585
AZMP_NAFC	FB-07			61.9117			62.2467
AZMP_NAFC	FB-08			61.8633			61.9117
AZMP_NAFC	FB-09			61.8117			61.575
AZMP_NAFC	FB-10			61.76			61.2383
AZMP_NAFC	FB-11			61.71			60.9033
AZMP_NAFC	FB-12			61.6583			60.57
AZMP_NAFC	CS-01			63.8667			63.5333
AZMP_NAFC	CS-02			63.6833			62.5
AZMP_NAFC	CS-03			63.55			61.4667
AZMP_NAFC	CS-04			63.4667			60.9333
AZMP_NAFC	CS-05			63.3833			60.4167
AZMP_NAFC	CS-06			69.3167			60.0167
AZMP_NAFC	CS-07			63.2333			59.4333
AZMP_NAFC	CS-08			63.2			59.1667
AZMP_NAFC	AI-01			65.889			62.314
AZMP_NAFC	AI-02			65.847			61.916
AZMP_NAFC	AI-03			65.826			61.027
AZMP_NAFC	AI-04			65.798			60.373
AZMP_NAFC	AI-05			65.767			59.784
AZMP_NAFC	AI-06			65.748			59.458
AZMP_NAFC	AI-07			65.726			58.005
AZMP_NAFC	AI-08			65.705			58.596
AZMP_NAFC	AI-09			65.685			58.328
AZMP_NAFC	AI-10			65.676			58.116
AZMP_NAFC	AI-11			65.658			57.942
AZMP_NAFC	AI-12			65.648			57.698
AZMP_MLI	TASO-01			49.2167			-64.8
AZMP_MLI	TASO-02			49.3167			-64.7167
AZMP_MLI	TASO-03			49.4333			-64.6167
AZMP_MLI	TASO-04			49.55			-64.5167
AZMP_MLI	TASO-05			49.6667			-64.4167
AZMP_MLI	TBB-01			49.3417			-58.5
AZMP_MLI	TBB-02			49.4667			-58.7167
AZMP_MLI	TBB-03			49.6			-58.9667
AZMP_MLI	TBB-04			49.725			-59.2167
AZMP_MLI	TBB-05			49.85			-59.45
AZMP_MLI	TBB-06			49.9833			-59.6833
AZMP_MLI	TBB-07			50.1			-59.9167
AZMP_MLI	TCEN-01			48.2083			-61.6083
AZMP_MLI	TCEN-02			48.35			-61.45
AZMP_MLI	TCEN-03			48.5			-61.3
AZMP_MLI	TCEN-04			48.6417			-61.1333
AZMP_MLI	TCEN-05			48.7917			-60.9667
AZMP_MLI	TDC-01			46.9583			-60.2167
AZMP_MLI	TDC-02			47.0167			-60.1333
AZMP_MLI	TDC-03			47.1083			-60.0083
AZMP_MLI	TDC-04			47.2667			-59.7833
AZMP_MLI	TDC-05			47.4333			-59.55
AZMP_MLI	TDC-06			47.5833			-59.3417
AZMP_MLI	TESL-01			48.575			-68.4917
AZMP_MLI	TESL-02			48.625			-68.5417
AZMP_MLI	TESL-03			48.6667			-68.5833
AZMP_MLI	TESL-04			48.7083			-68.625
AZMP_MLI	TESL-05			48.75			-68.6667
AZMP_MLI	TESL-06			48.7833			-68.7
AZMP_MLI	TESL-07			48.825			-68.75
AZMP_MLI	TIDM-01			46.7417			-61
AZMP_MLI	TIDM-02			46.8333			-61.25
AZMP_MLI	TIDM-03			46.9167			-61.5
AZMP_MLI	TIDM-04			47			-61.75
AZMP_MLI	TIDM-05			47.1667			-62.25
AZMP_MLI	TIDM-06			47.3333			-62.75
AZMP_MLI	TIDM-07			47.5			-63.25
AZMP_MLI	TIDM-08			47.6667			-63.75
AZMP_MLI	TIDM-09			47.7833			-64.0333
AZMP_MLI	TIDM-10			47.8333			-64.25
AZMP_MLI	TSI-01			49.2417			-66.2
AZMP_MLI	TSI-02			49.4			-66.2167
AZMP_MLI	TSI-03			49.55			-66.2333
AZMP_MLI	TSI-04			49.7167			-66.25
AZMP_MLI	TSI-05			49.8833			-66.2667
AZMP_MLI	TSI-06			50.05			-66.2833
AZMP_BIO	YL_01			43.7502			-66.4003
AZMP_BIO	YL_02			43.6799			-66.8513
AZMP_BIO	YL-03			43.6096			-67.3023
AZMP_BIO	YL-04			43.5392			-67.7534
AZMP_BIO	YL-05			43.4689			-68.2124
AZMP_BIO	YL-06			43.3986			-68.6643
AZMP_BIO	YL-07			43.3283			-69.1064
AZMP_BIO	YL-08			43.2579			-69.5574
AZMP_BIO	YL-09			43.1863			-70.0098
AZMP_BIO	YL-10			43.1567			-70.2724
AZMP_BIO	PL-01			43.0335			-70.0084
AZMP_BIO	PL-02			42.9547			-69.5574
AZMP_BIO	PL-03			42.876			-69.1064
AZMP_BIO	PL-04			42.7893			-68.6554
AZMP_BIO	PL-05			42.7024			-68.2044
AZMP_BIO	PL-06			42.6256			-67.7534
AZMP_BIO	PL-07			42.5526			-67.3023
AZMP_BIO	PL-08			42.4623			-66.8513
AZMP_BIO	PL-09			42.3778			-66.4003
AZMP_BIO	NEC-01			42.4183			-65.7433
AZMP_BIO	NEC-02			42.3367			-65.8083
AZMP_BIO	NEC-03			42.3			-65.84
AZMP_BIO	NEC-04			42.2717			-65.87
AZMP_BIO	NEC-05			42.2333			-65.9033
AZMP_BIO	NEC-06			42.2			-65.9383
AZMP_BIO	NEC-07			42.1633			-65.9683
AZMP_BIO	NEC-08			42.1183			-66.0374
AZMP_BIO	NEC-09			42.0617			-66.0833
AZMP_BIO	NEC-10			41.99			-66.1417
AZMP_BIO	BBL-01			43.25			-65.48
AZMP_BIO	BBL-02			43			-65.48
AZMP_BIO	BBL-03			42.76			-65.4833
AZMP_BIO	BBL-04			42.45			-65.4833
AZMP_BIO	BBL-05			42.133			65.5
AZMP_BIO	BBL-06			42			65.51
AZMP_BIO	BBL-07			41.867			65.35
AZMP_BIO	HL-01	44	24	44.4	63	27	63.45
AZMP_BIO	HL-02	44	16	44.2667	63	19	63.3167
AZMP_BIO	HL-03	43	53	43.8833	62	53	62.8833
AZMP_BIO	HL-04	43	29	43.4833	62	27	62.45
AZMP_BIO	HL-05	43	11	43.1833	62	6	62.1
AZMP_BIO	HL-05.3	43	0.1	43.0017	61	55	61.9167
AZMP_BIO	HL-05.5	42	56.82	42.947	61	49.8	61.83
AZMP_BIO	HL-06	42	49.9	42.8317	61	44	61.7333
AZMP_BIO	HL-06.3	42	44	42.7333	61	37	61.6167
AZMP_BIO	HL-06.5	42	40.55	42.6758	61	34	61.5667
AZMP_BIO	HL-06.7	42	37.1	42.6183	61	31	61.5167
AZMP_BIO	HL-07	42	28.5	42.475	61	26	61.4333
AZMP_BIO	HL-08	42	21.8	42.3633	61	20.5	61.3417
AZMP_BIO	HL-09	42	12	42.2	61	10	61.1667
AZMP_BIO	HL-09.4	42	8.04	42.134	61	8.67	61.1445
AZMP_BIO	HL-10	42	1.84	42.0307	61	3.99	61.0665
AZMP_BIO	HL-11	41	46.68	41.778	60	54.49	60.9082
AZMP_BIO	HL-12	41	24.63	41.4105	60	40	60.6667
AZMP_BIO	HL-13	41	1.25	41.0208	60	20.22	60.337
AZMP_BIO	HL-14	40	34.63	40.5772	59	57.19	59.9532
AZMP_BIO	HL-15	40	8.01	40.1335	59	34.16	59.5693
AZMP_BIO	HL-16	39	41.38	39.6897	59	11.12	59.1853
AZMP_BIO	HL-17	39	14.76	39.246	58	48.09	58.8015
AZMP_BIO	HL-18	38	48.14	38.8023	58	25.06	58.4177
AZMP_BIO	HL-19	38	21.52	38.3587	58	2.03	58.0338
AZMP_BIO	HL-20	37	54.9	37.915	57	39	57.65
AZMP_BIO	GUL-01			44.0979			-59.1061
AZMP_BIO	GUL-02			44.01			-59
AZMP_BIO	GUL-03			43.8885			-58.9537
AZMP_BIO	GUL-04			43.79			-58.9
AZMP_BIO	LL-01			45.825			-59.85
AZMP_BIO	LL-02			45.6583			-59.7017
AZMP_BIO	LL-03			45.4917			-59.5167
AZMP_BIO	LL-04			45.1583			-59.175
AZMP_BIO	LL-05			44.8167			-58.85
AZMP_BIO	LL-06			44.475			-58.5083
AZMP_BIO	LL-07			44.1333			-58.175
AZMP_BIO	LL-08			43.7833			-57.8333
AZMP_BIO	LL-09			43.4733			-57.5267
AZMP_BIO	STAB-01			46			-59.5333
AZMP_BIO	STAB-02			46.1083			-59.365
AZMP_BIO	STAB-03			46.2167			-59.195
AZMP_BIO	STAB-04			46.3			-59.065
AZMP_BIO	STAB-05			46.4167			-58.8833
AZMP_BIO	STAB-06			46.6449			-58.5457
AZMP_BIO	CSL-01			46.9583			-60.2167
AZMP_BIO	CSL-02			47.0233			-60.1167
AZMP_BIO	CSL-03			47.1			-59.9917
AZMP_BIO	CSL-04			47.2717			-59.7833
AZMP_BIO	CSL-05			47.4333			-59.5583
AZMP_BIO	CSL-06			47.5833			-59.3417
AZMP_BIO	LCM-01			44.7196			-57.6549
AZMP_BIO	LCM-02			44.7448			-57.4746
AZMP_BIO	LCM-03			44.7623			-57.3486
AZMP_BIO	LCM-04			44.78			-57.25
AZMP_BIO	LCM-05			44.8088			-57.0267
AZMP_BIO	LCM-06			44.8476			-56.8077
AZMP_BIO	LCM-07			44.89			-56.63
AZMP_BIO	LCM-08			44.92			-56.44
AZMP_BIO	LCM-09			44.98			-56.14
AZMP_BIO	LCM-10			45			-56.03
AZMP_BIO	SPB-05.5			45.0601			-55.84
AZMP_BIO	SPB-06			44.9015			-55.84
AZMP_BIO	SPB-07			44.8663			-55.84
AZMP_BIO	SPB-07.5			44.82			-55.84
AZMP_BIO	SPB-08			44.76			-55.84
AZMP_BIO	SPB-09			44.53			-55.84
AZMP_BIO	SPB-10			44.24			-55.84
Ocean_Weather_Station	ALPHA	62	0	62	33	0	33
Ocean_Weather_Station	BRAVO	56	30	56.5	51	0	51
Ocean_Weather_Station	CHARLIE	52	45	52.75	39	30	39.5
Ocean_Weather_Station	DELTA	41	0	41	41	0	41
Ocean_Weather_Station	ECHO	35	0	35	48	0	48
Ocean_Weather_Station	HOTEL	36	0	36	70	0	70
AZMP	ESG	46	48.07	46.8012	62	0.02	62.0003
AZMP	IML-07	49	14.45	49.2408	66	11.7	66.195
AZMP	IML-BA	48	35.15	48.5858	63	52.89	63.8815
AZMP	RIMOUSKI	48	40.25	48.6708	68	34.91	68.5818
AZMP	VAS	47	47.07	47.7845	64	1.9	64.0317
AZMP_NAFC	Bbn-1.5			48.8513			-52.7666
AZMP_NAFC	Bbn-2			49.065			-52.4
AZMP_NAFC	Bbn-3			49.39			-51.83
AZMP_NAFC	Bbn-4			50			-50.7
AZMP_NAFC	Bbn-5			50.38			-50
AZMP_NAFC	Bbn-6			50.85			-49.11
AZMP_NAFC	TB-01			47.71			-53.68
AZMP_NAFC	TB-02			47.82			-53.5825
AZMP_NAFC	TB-03			47.93			-53.485
AZMP_NAFC	TB-04			48.04			-53.3875
AZMP_NAFC	TB-05			48.15			-53.29
AZMP_NAFC	TB-06			48.23			-53.1425
AZMP_NAFC	TB-07			48.31			-52.995
AZMP_NAFC	TB-08			48.39			-52.8475
AZMP_NAFC	TB-09			48.47			-52.7
